# Supplementary material for: Optimizing offshore wind export cable routing using GIS-based environmental heat maps
Source: Copernicus journal article supplement (doi:10.5194/wes-9-1105-2024), 2024-05-08
Supplement: Supplementary file 1 [file wes-9-1105-2024-supplement.pdf]

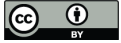

*Supplement of*

## **Optimizing offshore wind export cable routing using GIS-based environmental heat maps**

**Joni Thomas Backstrom et al.**

*Correspondence to:* Joni Thomas Backstrom ([backstromj@uncw.edu](mailto:backstromj@uncw.edu))

The copyright of individual parts of the supplement might differ from the article licence.

## Supplement Table S1

### Links to Data Sources

| <b>Data Layer</b>                                                                      | <b>Source</b>                                                                                                                                                                       |
|----------------------------------------------------------------------------------------|-------------------------------------------------------------------------------------------------------------------------------------------------------------------------------------|
| Study Area                                                                             | Arbitrarily determined by authors                                                                                                                                                   |
| Wind Energy Area Polygon                                                               | <a href="https://www.boem.gov/renewable-energy/state-activities/carolina-long-bay">https://www.boem.gov/renewable-energy/state-activities/carolina-long-bay</a>                     |
| Bathymetry (Ocean Reports)                                                             | <a href="https://marinecadastre.gov/oceanreports/#/@-10737743.881037742,4753280.983019757/4">https://marinecadastre.gov/oceanreports/#/@-10737743.881037742,4753280.983019757/4</a> |
| Bathymetry Contours (Ocean Reports)                                                    | <a href="https://marinecadastre.gov/oceanreports/#/@-10737743.881037742,4753280.983019757/4">https://marinecadastre.gov/oceanreports/#/@-10737743.881037742,4753280.983019757/4</a> |
| Bathymetry (GEBCO)                                                                     | <a href="https://download.gebco.net/">https://download.gebco.net/</a>                                                                                                               |
| East Coast Sediment Texture Database / ECSTD2014 Sample Points (USGS)                  | <a href="https://woodshole.er.usgs.gov/openfile/of2005-1001/htmldocs/datacatalog.htm">https://woodshole.er.usgs.gov/openfile/of2005-1001/htmldocs/datacatalog.htm</a>               |
| Continental Margin Mapping Program / CONMAP Sediment Size Distribution Polygons (USGS) | <a href="https://woodshole.er.usgs.gov/openfile/of2005-1001/htmldocs/datacatalog.htm">https://woodshole.er.usgs.gov/openfile/of2005-1001/htmldocs/datacatalog.htm</a>               |
| F00679 Backscatter Data (NOAA)                                                         | <a href="https://www.ngdc.noaa.gov/nos/F00001-F02000/F00679.html">https://www.ngdc.noaa.gov/nos/F00001-F02000/F00679.html</a>                                                       |
| H11413 Sidescan Data (NOAA)                                                            | <a href="https://www.ngdc.noaa.gov/nos/H10001-H12000/H11413.html">https://www.ngdc.noaa.gov/nos/H10001-H12000/H11413.html</a>                                                       |
| H12930 Backscatter Data (NOAA)                                                         | <a href="https://www.ngdc.noaa.gov/nos/H12001-H14000/H12930.html">https://www.ngdc.noaa.gov/nos/H12001-H14000/H12930.html</a>                                                       |
| Essential Fish Habitat (NOAA)                                                          | <a href="https://www.habitat.noaa.gov/protection/efh/newInv/index.html">https://www.habitat.noaa.gov/protection/efh/newInv/index.html</a>                                           |

|                                                                  |                                                                                                                                                                                     |
|------------------------------------------------------------------|-------------------------------------------------------------------------------------------------------------------------------------------------------------------------------------|
| Habitat Areas of Particular Concern (NOAA)                       | <a href="https://www.habitat.noaa.gov/protection/efh/newInv/index.html">https://www.habitat.noaa.gov/protection/efh/newInv/index.html</a>                                           |
| Cetacean Biologically Important Areas (Ocean Reports)            | <a href="https://marinecadastre.gov/oceanreports/#/@-10737743.881037742,4753280.983019757/4">https://marinecadastre.gov/oceanreports/#/@-10737743.881037742,4753280.983019757/4</a> |
| Audubon Important Bird Areas (Audubon Society via Ocean Reports) | <a href="https://marinecadastre.gov/oceanreports/#/@-10737743.881037742,4753280.983019757/4">https://marinecadastre.gov/oceanreports/#/@-10737743.881037742,4753280.983019757/4</a> |
| Coastal Barrier Resource Areas                                   | <a href="https://marinecadastre.gov/oceanreports/#/@-10737743.881037742,4753280.983019757/4">https://marinecadastre.gov/oceanreports/#/@-10737743.881037742,4753280.983019757/4</a> |
| Protected Areas                                                  | <a href="https://marinecadastre.gov/oceanreports/#/@-10737743.881037742,4753280.983019757/4">https://marinecadastre.gov/oceanreports/#/@-10737743.881037742,4753280.983019757/4</a> |
| Danger Zones                                                     | <a href="https://marinecadastre.gov/oceanreports/#/@-10737743.881037742,4753280.983019757/4">https://marinecadastre.gov/oceanreports/#/@-10737743.881037742,4753280.983019757/4</a> |
| Shipwrecks                                                       | <a href="https://marinecadastre.gov/oceanreports/#/@-10737743.881037742,4753280.983019757/4">https://marinecadastre.gov/oceanreports/#/@-10737743.881037742,4753280.983019757/4</a> |
| Artificial Reefs                                                 | <a href="https://marinecadastre.gov/oceanreports/#/@-10737743.881037742,4753280.983019757/4">https://marinecadastre.gov/oceanreports/#/@-10737743.881037742,4753280.983019757/4</a> |
| Navigation Channels                                              | <a href="https://marinecadastre.gov/oceanreports/#/@-10737743.881037742,4753280.983019757/4">https://marinecadastre.gov/oceanreports/#/@-10737743.881037742,4753280.983019757/4</a> |
| Shipping Lanes                                                   | <a href="https://marinecadastre.gov/oceanreports/#/@-10737743.881037742,4753280.983019757/4">https://marinecadastre.gov/oceanreports/#/@-10737743.881037742,4753280.983019757/4</a> |
| Hardbottom/Essential Fish Habitat Areas                          | Digitized from Captain Seagull's Fishing Chart                                                                                                                                      |
